# Supplementary material for: Triple stable isotope analysis to estimate the diet of the Velvet Scoter (Melanitta fusca) in the Baltic Sea
Source: PeerJ. 2018 Jun 27;6:e5128. doi: 10.7717/peerj.5128 (PMC6026463; doi:10.7717/peerj.5128)
Supplement: Appendix S5 — Different sets of prior information as the wet weight (WW) and the organic matter weight (AFDW) of food objects from gut contents analysis. [file peerj-06-5128-s006.docx]

Contributions of food sources to the diet of velvet scoters, calculated by five source mixing model (ModelC) using triple stable isotope values of δ34S, δ13C and δ15N and different sets of prior information as wet weight (WW) or organic matter weight (AFDW) of food objects from gut contents analysis.

| Sources | Proportions, % as Mean±SD (CI95) | | |  |
| --- | --- | --- | --- | --- |
| No prior information | WW | AFDW |  |
| *Saduria entomon* | 9 ± 6 (0-20)* | 35 ± 4 (27-43) | 24 ± 5 (16-34)* |  |
| *Crangon crangon* | 15 ± 9 (0-31)* | 0,3 ± 0,5 (0-1) | 1 ± 1 (0-4) |  |
| *Mya arenaria & Cerastoderma glaucum* | 51 ± 9 (32-67)* | 46 ± 4 (38-53) | 56 ± 5 (46-65)* |  |
| *Macoma balthica* | 7 ± 7 (0-21) | 16 ± 3 (9-22) | 16 ± 3 (10-23) |  |
| *Polychaetes* | 17 ± 9 (0-33)* | 3 ± 2 (0-6) | 2 ± 2 (0-6) |  |

* shows negligible difference between outputs of ModelC (this table) and Model0 (Table 5 in the main text).
